# Supplementary material for: Cheonggukjang-Specific Component 1,3-Diphenyl-2-Propanone as a Novel PPARα/γ Dual Agonist: An In Vitro and In Silico Study
Source: MDPI journal article supplement (doi:10.3390/ijms221910884), 2021-10-08
Supplement: s1 [file s1]

## Supplementary Materials:

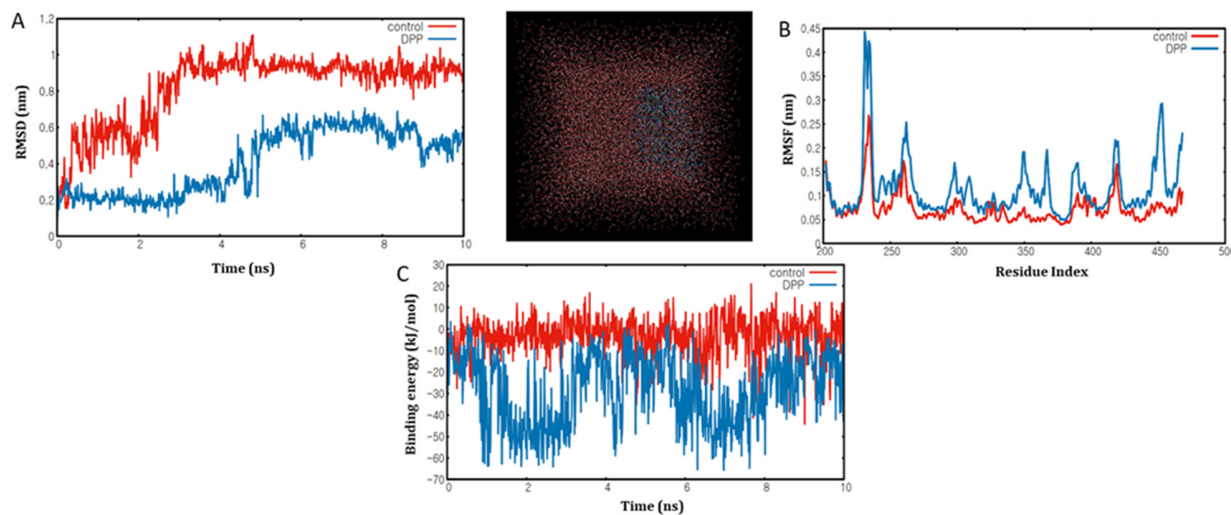

**Figure S1.** MD simulation analyses (A) Root mean square deviation (RMSD) plot of PPAR $\gamma$  Rosiglitazone (Red) and 1,3 diphenyl 2 propanone (Blue) complex at 10 ns of molecular dynamic simulation. (B) The RMSF plot of the backbone heavy atoms of the Rosiglitazone (Red) and 1,3 diphenyl 2 propanone (Blue) complex. (C) Binding energy plot of Rosiglitazone (Red) and 1,3 diphenyl 2 propanone (Blue) complex at 10 ns.

**Table S1.** Hydrogen bond donor and acceptor residues from the molecular dynamic simulation (PPAR $\gamma$ )

| Donor     | Hydrogen   | Acceptor  |
|-----------|------------|-----------|
| ARG288NE  | ARG288HE   | EQPX478O1 |
| ARG288NH2 | ARG288HH21 | EQPX478O1 |
| SER289OG  | SER289HG1  | EQPX478O1 |
